# Supplementary material for: Stable DOPG/Glycyrrhizin Vesicles with a Wide Range of Mixing Ratios: Structure and Stability as Seen by Scattering Experiments and Cryo-TEM
Source: MDPI journal article supplement (doi:10.3390/molecules26164959), 2021-08-16
Supplement: s1 [file s1]

Electronic Supplementary Material for:

Stable DOPG/glycyrrhizin vesicles with a wide  
range of mixing ratios:

Structure and stability as seen by  
scattering experiments and cryo-TEM

Carina Dargel<sup>1,♣</sup>, Friederike Gräbitz-Bräuer<sup>1</sup>, Ramsia Geisler<sup>1,‡</sup>,  
Pascal Fandrich<sup>1</sup>, Yvonne Hannappel<sup>1</sup>, Lionel Porcar<sup>2</sup>  
and Thomas Hellweg<sup>1,\*</sup>

<sup>1</sup> Physical and Biophysical Chemistry, Bielefeld University,  
Universitätsstr. 25, 33615 Bielefeld, Germany

\* E-mail: thomas.hellweg@uni-bielefeld.de, phone: +49 (0)521 1062055

<sup>2</sup> Institut Laue-Langevin - 71 avenue des Martyrs CS 20156,  
38042 Grenoble Cedex 9 - France

♣ Current address: Institute of Physical Chemistry, University of Münster,  
Corrensstraße 28/30, 48149 Münster, Germany

‡ Current address: Medical Department 2, Hematology/Oncology and  
Infectious Diseases, University Hospital of Frankfurt, Frankfurt

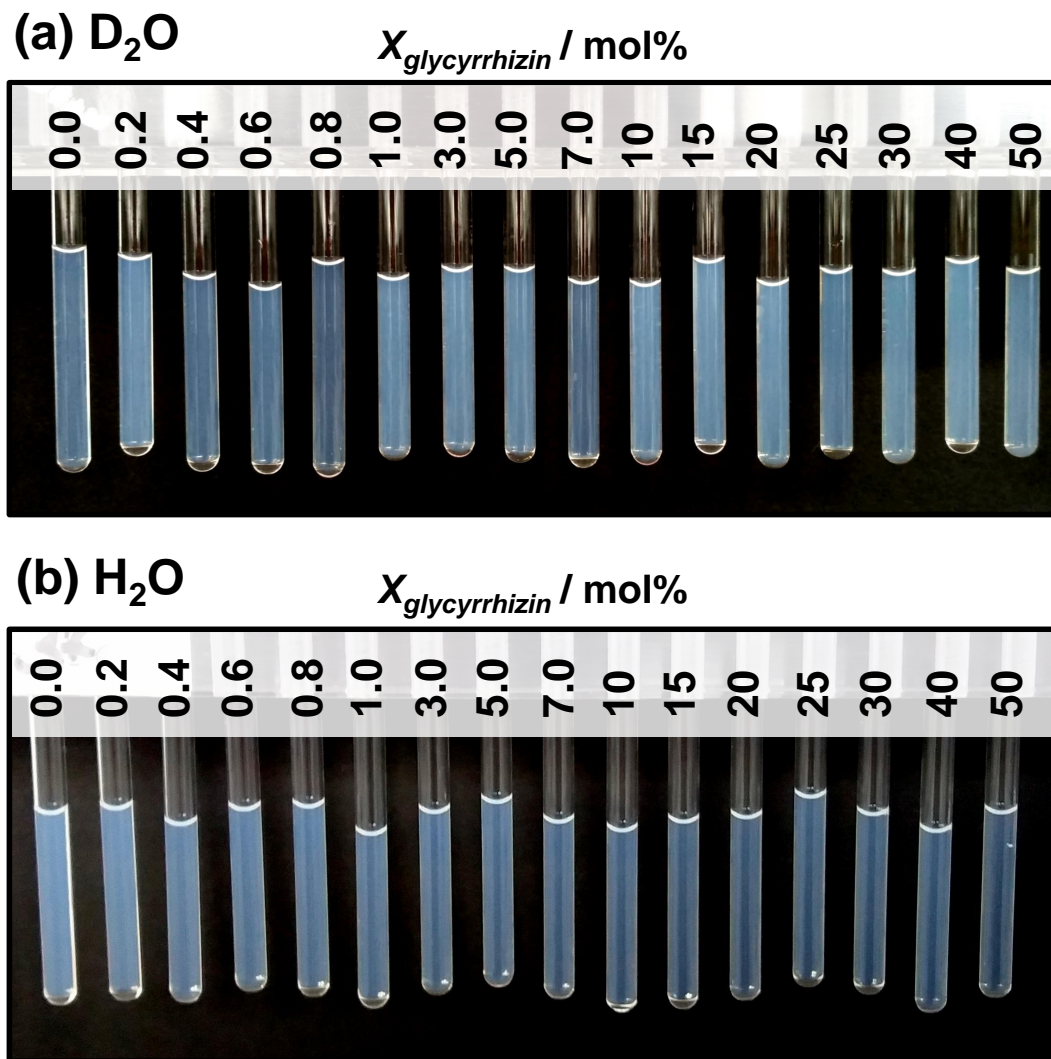

Figure S1. Photographs of mixtures of DOPG and glycyrrhizin in (a) D<sub>2</sub>O and (b) H<sub>2</sub>O at room temperature ( $\approx 25^\circ\text{C}$ ). The samples were extruded (with increasing  $x_{\text{glycyrrhizin}}$ ) through a membrane with a pore size of  $500\text{ \AA}$ . All samples exhibit a bluish color and are stable for at least six month. By eye no significant difference in appearance of the samples can be observed.

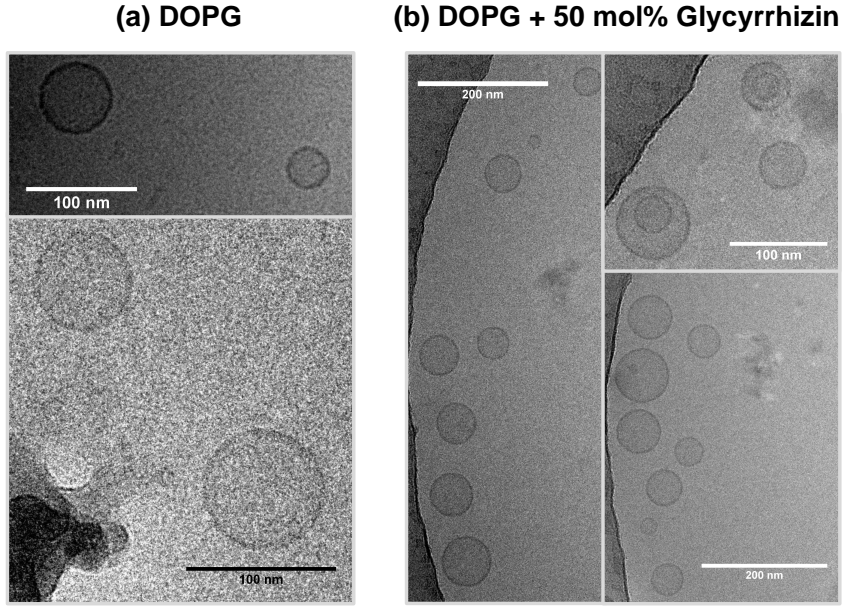

Figure S2. Cryo-TEM images of (a) DOPG and (b) DOPG with 50 mol% glycyrrhizin in H<sub>2</sub>O buffer solution. The samples were diluted to a DOPG mass concentration of 0.5 g·L<sup>-1</sup> and were kept at room temperature ( $\approx 25^\circ\text{C}$ ) before freezing. In both cases, unilamellar vesicles are observed.

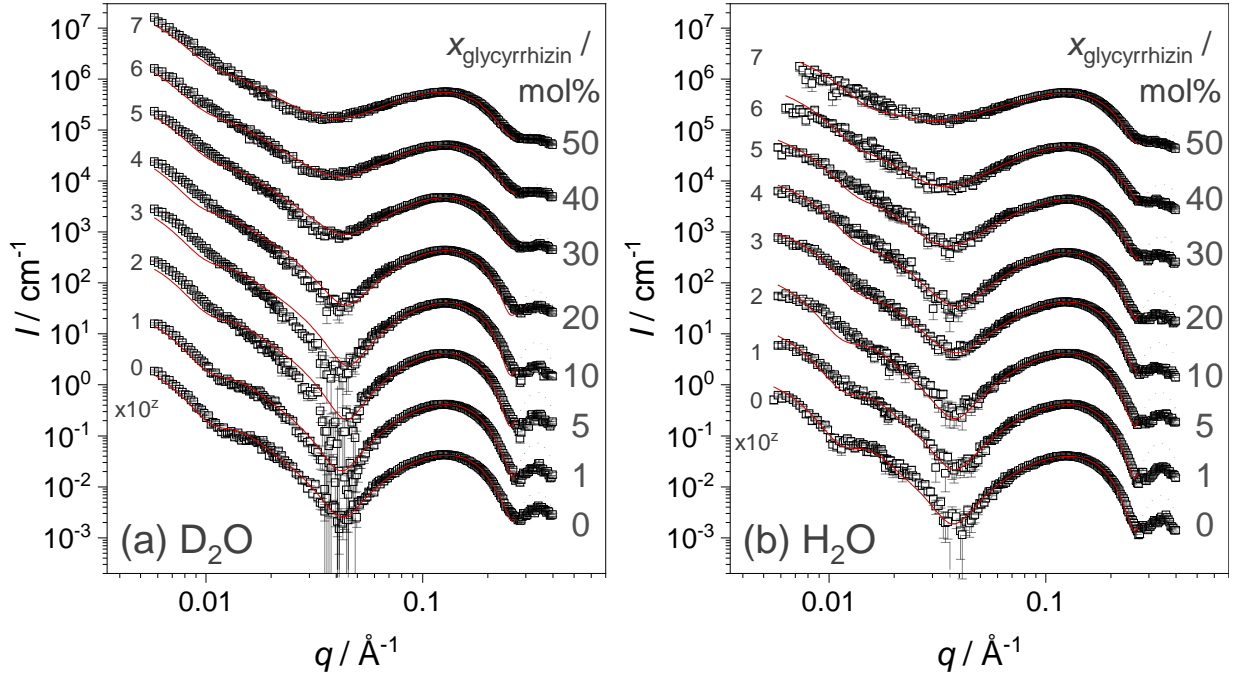

Figure S3. Comparison of X-ray scattering data for samples with different  $x_{\text{glycyrrhizin}}$  in (a) D<sub>2</sub>O and (b) H<sub>2</sub>O buffer as solvent. The glycyrrhizin content  $x_{\text{glycyrrhizin}}$  is denoted by the numbers on the right. For better readability, the data are scaled by different power of 10 indicated by the exponent  $z$  given as numbers on the left side of the graphs. Solid lines are CMS model fits from SASView [59]. Dotted lines are extensions of the CMS fits beyond the fit range.

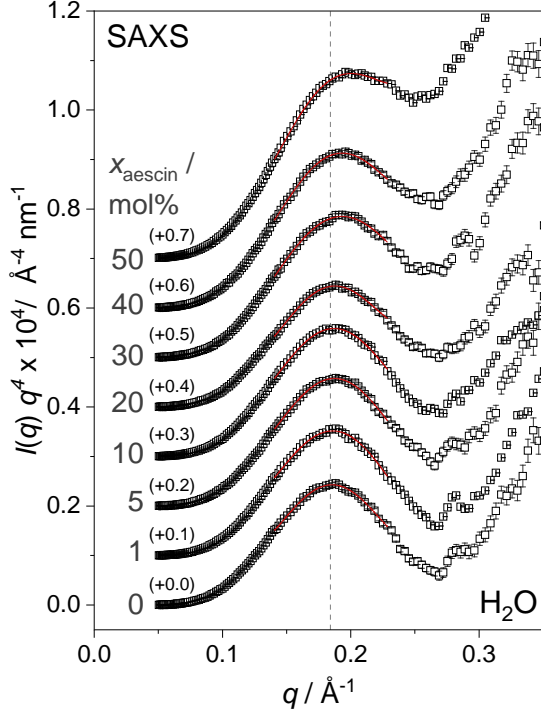

Figure S4. Modified Kratky-Porod (MKP) plots for SAXS data obtained for samples with different  $x_{\text{glycyrrhizin}}$  in  $\text{H}_2\text{O}$  buffer as solvent[54]. Solid lines are 4th order polynomial approximations. The maximum of these approximations was used to determine the membrane thickness  $d_{\text{MKP}}$ . The glycyrrhizin content  $x_{\text{glycyrrhizin}}$  is indicated by the numbers on the left. For better readability of the figure, the data is baseline-shifted by the numbers in brackets.

Table S1: Total membrane thickness  $d_{\text{MKP}}$  derived from the MKP plot of SANS and SAXS data of samples in  $\text{D}_2\text{O}$  and  $\text{H}_2\text{O}$ .

| $x_{\text{glycyrrhizin}}$<br>mol% | $d_{\text{MKP,SANS,D}_2\text{O}}$<br>Å | $x_{\text{glycyrrhizin}}$<br>mol% | $d_{\text{MKP,SAXS,D}_2\text{O}}$<br>Å | $d_{\text{MKP,SAXS,H}_2\text{O}}$<br>Å |
|-----------------------------------|----------------------------------------|-----------------------------------|----------------------------------------|----------------------------------------|
| 0                                 | $30.5 \pm 0.3$                         | 0                                 | $33.3 \pm 0.4$                         | $34.1 \pm 0.4$                         |
| 1                                 | $30.9 \pm 0.3$                         | 1                                 | $33.7 \pm 0.4$                         | $34.0 \pm 0.4$                         |
| 3                                 | $30.7 \pm 0.3$                         | 5                                 | $33.7 \pm 0.4$                         | $33.8 \pm 0.4$                         |
| 10                                | $30.4 \pm 0.3$                         | 10                                | $33.5 \pm 0.4$                         | $33.8 \pm 0.4$                         |
| 20                                | $29.4 \pm 0.3$                         | 20                                | $33.0 \pm 0.3$                         | $33.7 \pm 0.4$                         |
| 30                                | $29.6 \pm 0.3$                         | 30                                | $31.9 \pm 0.3$                         | $32.7 \pm 0.3$                         |
| 40                                | $29.6 \pm 0.3$                         | 40                                | $31.7 \pm 0.3$                         | $32.7 \pm 0.3$                         |
| 50                                | $28.0 \pm 0.4$                         | 50                                | $30.9 \pm 0.3$                         | $31.6 \pm 0.3$                         |

Table S2: Parameters to determine *NSLDs* and *XSLDs* of DOPG and glycyrrhizin at a temperature of 30 °C.  $M$ : molar mass,  $V_{mol}$ : molar volume,  $V$ : molecular volume,  $\rho$ : density.

|              | molecular<br>formular                             | $M$<br>g mol <sup>-1</sup> | $V_{mol}$<br>cm <sup>3</sup> mol <sup>-1</sup> | $V$<br>Å <sup>3</sup> | $\rho$<br>g cm <sup>-3</sup> | $NSLD$<br>10 <sup>-6</sup> Å <sup>-2</sup> | $XSLD$<br>10 <sup>-6</sup> Å <sup>-2</sup> |
|--------------|---------------------------------------------------|----------------------------|------------------------------------------------|-----------------------|------------------------------|--------------------------------------------|--------------------------------------------|
| DOPG         | C <sub>42</sub> H <sub>78</sub> O <sub>10</sub> P | 773.53                     | 761.78                                         | 1265.00 [53]          | 0.978                        | 0.385                                      | 9.15                                       |
| DOPG, head   | C <sub>8</sub> H <sub>12</sub> O <sub>10</sub> P  | 299.03                     | 175.24                                         | 291.00 [53]           | 1.706                        | 2.45                                       | 15.1                                       |
| DOPG, tail   | C <sub>34</sub> H <sub>66</sub>                   | 474.50                     | 586.54                                         | 974.00 [53]           | 0.809                        | -0.214                                     | 7.82                                       |
| glycyrrhizin | C <sub>42</sub> H <sub>62</sub> O <sub>16</sub>   | 822.93                     | 572.6 [73]                                     | 950.85 [73]           | 1.44 [73]                    | 1.48                                       | 13.2                                       |

Table S3: Core radii  $R_c$  obtained from CMS fits to SANS and SAXS data. In the case of samples in D<sub>2</sub>O values were determined from SANS and in the case of H<sub>2</sub>O values were derived from SAXS. In the latter case, the minimal  $q$ -value was not small enough for exact determination of  $R_c$  values and the uncertainty of these values might be larger than the depicted error. Values in brackets denote polydispersities of  $R_c$  ( $\sigma_{R_c}$ ) in %.

| $x_{\text{glycyrrhizin}}$<br>mol% | $R_c$ , SANS, D <sub>2</sub> O<br>Å | $x_{\text{glycyrrhizin}}$<br>mol% | $R_c$ , SAXS, H <sub>2</sub> O<br>Å |
|-----------------------------------|-------------------------------------|-----------------------------------|-------------------------------------|
| 0                                 | 207 ± 2 (37)                        | 0                                 | 204 ± 7 (32)                        |
| 1                                 | 208 ± 3 (39)                        | 1                                 | 191 ± 5 (36)                        |
| 3                                 | 203 ± 3 (42)                        | 5                                 | 172 ± 5 (38)                        |
| 10                                | 202 ± 3 (45)                        | 10                                | 142 ± 5 (46)                        |
| 20                                | 205 ± 3 (48)                        | 20                                | 138 ± 5 (50)                        |
| 30                                | 176 ± 3 (55)                        | 30                                | 131 ± 1 (56)                        |
| 40                                | 172 ± 3 (61)                        | 40                                | 124 ± 1 (59)                        |
| 50                                | 156 ± 2 (64)                        | 50                                | 108 ± 5 (60)                        |

Table S4: Scattering length densities for neutrons ( $NSLD_{\text{tail}}$ ) and X-rays ( $XSLD_{\text{tail}}$ ) for the hydrophobic membrane part. Values were determined by fitting SAXS data of samples in D<sub>2</sub>O and H<sub>2</sub>O buffer by the CMS model.  $NSLD$  values for samples in D<sub>2</sub>O (indicated in italic letters) were calculated based on the corresponding  $XSLD$  values. Additionally, calculated values for the head group region are listed for comparison and were taken from Table S2.

| $x_{\text{glycyrrhizin}}$<br>mol%                             | $NSLD_{\text{tail, D}_2\text{O}}$<br>$10^{-6}\text{\AA}^{-2}$ | $x_{\text{glycyrrhizin}}$<br>mol%                             | $XSLD_{\text{tail, D}_2\text{O}}$<br>$10^{-6}\text{\AA}^{-2}$ | $XSLD_{\text{tail, H}_2\text{O}}$<br>$10^{-6}\text{\AA}^{-2}$ |
|---------------------------------------------------------------|---------------------------------------------------------------|---------------------------------------------------------------|---------------------------------------------------------------|---------------------------------------------------------------|
| 0                                                             | <i>-0.23 ± 0.01</i>                                           | 0                                                             | 8.23 ± 0.01                                                   | 8.18 ± 0.01                                                   |
| 1                                                             | <i>-0.21 ± 0.01</i>                                           | 1                                                             | 8.23 ± 0.01                                                   | 8.19 ± 0.01                                                   |
| 3                                                             | <i>-0.16 ± 0.01</i>                                           | 5                                                             | 8.28 ± 0.01                                                   | 8.18 ± 0.01                                                   |
| 10                                                            | <i>-0.05 ± 0.01</i>                                           | 10                                                            | 8.28 ± 0.01                                                   | 8.18 ± 0.01                                                   |
| 20                                                            | <i>0.11 ± 0.01</i>                                            | 20                                                            | 8.24 ± 0.01                                                   | 8.87 ± 0.01                                                   |
| 30                                                            | <i>0.28 ± 0.02</i>                                            | 30                                                            | 8.20 ± 0.01                                                   | 8.11 ± 0.01                                                   |
| 40                                                            | <i>0.37 ± 0.02</i>                                            | 40                                                            | 8.09 ± 0.01                                                   | 8.06 ± 0.01                                                   |
| 50                                                            | <i>0.48 ± 0.02</i>                                            | 50                                                            | 8.02 ± 0.01                                                   | 7.89 ± 0.01                                                   |
| $NSLD_{\text{head, D}_2\text{O}}$<br>$10^{-6}\text{\AA}^{-2}$ |                                                               | $XSLD_{\text{head, D}_2\text{O}}$<br>$10^{-6}\text{\AA}^{-2}$ |                                                               | $XSLD_{\text{head, H}_2\text{O}}$<br>$10^{-6}\text{\AA}^{-2}$ |
| 2.45                                                          |                                                               | 15.1                                                          |                                                               | 15.1                                                          |

Table S5: Thickness of the hydrophobic membrane part  $d_{\text{tail}}$  obtained from CMS fits to SANS and SAXS data of samples prepared in D<sub>2</sub>O and H<sub>2</sub>O buffer. Values in brackets denote polydispersities of  $d_{\text{tail}}$  ( $\sigma_{d_{\text{tail}}}$ ) in %.

| $x_{\text{glycyrrhizin}}$<br>mol% | $d_{\text{tail, SANS, D}_2\text{O}}$<br>$\text{\AA}$ | $x_{\text{glycyrrhizin}}$<br>mol% | $d_{\text{tail, SAXS, D}_2\text{O}}$<br>$\text{\AA}$ | $d_{\text{tail, SAXS, H}_2\text{O}}$<br>$\text{\AA}$ |
|-----------------------------------|------------------------------------------------------|-----------------------------------|------------------------------------------------------|------------------------------------------------------|
| 0                                 | 26.3 ± 0.1 (-)                                       | 0                                 | 31.3 ± 0.1 (3)                                       | 31.0 ± 0.2 (0)                                       |
| 1                                 | 25.9 ± 0.1 (-)                                       | 1                                 | 31.4 ± 0.1 (1)                                       | 31.1 ± 0.2 (0)                                       |
| 3                                 | 25.9 ± 0.1 (-)                                       | 5                                 | 31.7 ± 0.1 (1)                                       | 31.0 ± 0.1 (0)                                       |
| 10                                | 25.9 ± 0.1 (-)                                       | 10                                | 31.5 ± 0.1 (4)                                       | 30.9 ± 0.2 (6)                                       |
| 20                                | 25.9 ± 0.1 (-)                                       | 20                                | 31.2 ± 0.2 (6)                                       | 30.9 ± 0.2 (4)                                       |
| 30                                | 26.0 ± 0.1 (-)                                       | 30                                | 30.8 ± 0.2 (10)                                      | 30.4 ± 0.2 (5)                                       |
| 40                                | 26.0 ± 0.1 (-)                                       | 40                                | 30.0 ± 0.1 (12)                                      | 30.1 ± 0.1 (7)                                       |
| 50                                | 25.6 ± 0.1 (-)                                       | 50                                | 29.7 ± 0.2 (13)                                      | 28.9 ± 0.2 (9)                                       |
